# Supplementary material for: Association between Environmental Cadmium Exposure and Osteoporosis Risk in Postmenopausal Women: A Systematic Review and Meta-Analysis
Source: MDPI journal article supplement (doi:10.3390/ijerph20010485), 2022-12-28
Supplement: s1 [file s1]

## **Supplementary Materials**

### **Association between environmental cadmium exposure and osteoporosis risk in postmenopausal women: a systematic review and meta-analysis**

Carlos Tadashi Kunioka<sup>1,2</sup>, Maria Conceição Manso<sup>1,3,4</sup>, Márcia Carvalho<sup>1,3,5,6,\*</sup>

<sup>1</sup> FP-I3ID, FP-BHS, University Fernando Pessoa, 4249-004 Porto, Portugal

<sup>2</sup> Western Paraná State University (UNIOESTE), 85819-110 Cascavel, Paraná, Brazil

<sup>3</sup> Faculty of Health Sciences, University Fernando Pessoa, 4200-150 Porto, Portugal

<sup>4</sup> LAQV, REQUIMTE, University of Porto, 4050-313 Porto, Portugal

<sup>5</sup> Associate Laboratory i4HB-Institute for Health and Bioeconomy, Faculty of Pharmacy, University of Porto, 4050-313 Porto, Portugal

<sup>6</sup> UCIBIO-REQUIMTE, Laboratory of Toxicology, Department of Biological Sciences, Faculty of Pharmacy, University of Porto, 4050-313 Porto, Portugal

\* Correspondence: mcarv@ufp.edu.pt

Address:

Faculty of Health Sciences

University Fernando Pessoa

Rua Carlos da Maia, 296

4200-150 Porto, Portugal

Tel.: +351 225071300

**Table S1.** PubMed search strategy.

| Database | Search strategy                                                                                                                                                                                                                                                                                                                                                                                                                                                                                                                                                                                                                                                                                                                                                                                                                                                                                                                                                                                                                                                                                                                                                                                                                                                                                                                   | Search results |
|----------|-----------------------------------------------------------------------------------------------------------------------------------------------------------------------------------------------------------------------------------------------------------------------------------------------------------------------------------------------------------------------------------------------------------------------------------------------------------------------------------------------------------------------------------------------------------------------------------------------------------------------------------------------------------------------------------------------------------------------------------------------------------------------------------------------------------------------------------------------------------------------------------------------------------------------------------------------------------------------------------------------------------------------------------------------------------------------------------------------------------------------------------------------------------------------------------------------------------------------------------------------------------------------------------------------------------------------------------|----------------|
| PubMed   | ((("cadmium"[MeSH Terms] OR "cadmium"[All Fields]) AND ("womans"[All Fields] OR "women"[MeSH Terms] OR "women"[All Fields] OR "woman"[All Fields] OR "women s"[All Fields] OR "womens"[All Fields] OR ("womans"[All Fields] OR "women"[MeSH Terms] OR "women"[All Fields] OR "woman"[All Fields] OR "women s"[All Fields] OR "womens"[All Fields]) OR ("femal"[All Fields] OR "female"[MeSH Terms] OR "female"[All Fields] OR "females"[All Fields] OR "female s"[All Fields] OR "females"[All Fields])) AND ("bone density"[MeSH Terms] OR ("bone"[All Fields] AND "density"[All Fields]) OR "bone density"[All Fields]) AND ("environmental exposure"[All Fields] OR ("environ"[All Fields] OR "environment"[MeSH Terms] OR "environment"[All Fields] OR "environments"[All Fields] OR "environment s"[All Fields] OR "environs"[All Fields])) AND 2008/01/01:2021/12/31[Date - Publication]) NOT (("child"[MeSH Terms] OR "child"[All Fields] OR "children"[All Fields] OR "child s"[All Fields] OR "children s"[All Fields] OR "childrens"[All Fields] OR "childs"[All Fields]) AND ("child"[MeSH Terms] OR "child"[All Fields] OR "children"[All Fields] OR "child s"[All Fields] OR "children s"[All Fields] OR "childrens"[All Fields] OR "childs"[All Fields]) AND ("animals"[MeSH Terms:noexp] OR "animal"[All Fields])) | 44             |

**Table S2.** Individual quality assessment of studies included in the systematic review using the Joanna Briggs Institute (JBI) critical appraisal checklist for cross-sectional studies.

| Study                        | Q1 | Q2 | Q3 | Q4 | Q5 | Q6 | Q7 | Q8 | %   | Risk |
|------------------------------|----|----|----|----|----|----|----|----|-----|------|
| Gallagher <i>et al.</i> 2008 | ✓  | ✓  | ✓  | ✓  | ✓  | ✓  | ✓  | ✓  | 100 | Low  |
| Engstrom <i>et al.</i> 2009  | ✓  | ✓  | ✓  | ✓  | X  | X  | ✓  | ✓  | 75  | Low  |
| Horiguchi <i>et al.</i> 2010 | ✓  | ✓  | ✓  | ✓  | X  | X  | ✓  | ✓  | 75  | Low  |
| Suwazono <i>et al.</i> 2010  | ✓  | ✓  | ✓  | ✓  | ✓  | ✓  | ✓  | ✓  | 100 | Low  |
| Chen <i>et al.</i> 2011      | ✓  | ✓  | ✓  | ✓  | ✓  | ✓  | ✓  | ✓  | 100 | Low  |
| Engstrom <i>et al.</i> 2011  | ✓  | ✓  | ✓  | ✓  | ✓  | ✓  | ✓  | ✓  | 100 | Low  |
| Kim <i>et al.</i> 2014       | ✓  | ✓  | ✓  | ✓  | ✓  | ✓  | ✓  | ✓  | 100 | Low  |
| Callan <i>et al.</i> 2015    | ✓  | ✓  | ✓  | ✓  | ✓  | ✓  | ✓  | ✓  | 100 | Low  |
| Lv <i>et al.</i> 2017        | ✓  | ✓  | ✓  | ✓  | ✓  | ✓  | ✓  | ✓  | 100 | Low  |
| La-Up <i>et al.</i> 2021     | ✓  | ✓  | ✓  | ✓  | ✓  | ✓  | ✓  | ✓  | 100 | Low  |

Q1. Were the criteria for inclusion in the sample clearly defined?; Q2. Were the study subjects and the setting described in detail?; Q3. Was the exposure measured in a valid and reliable way?; Q4. Were objective, standard criteria used for measurement of the condition?; Q5. Were confounding factors identified?; Q6. Were strategies to deal with confounding factors stated?; Q7. Were the outcomes measured in a valid and reliable way?; Q8. Was appropriate statistical analysis used?

‘✓’ indicates yes, and ‘X’ indicates no

**Table S3.** Egger's test of studies investigating the association between UCd levels and risk of osteoporosis in the high-level Cd exposure group.

| Egger's Regression-Based Test <sup>a</sup> |             |            |        |                 |                         |         |
|--------------------------------------------|-------------|------------|--------|-----------------|-------------------------|---------|
| Parameter                                  | Coefficient | Std. Error | t      | Sig. (2-tailed) | 95% Confidence Interval |         |
|                                            |             |            |        |                 | Lower                   | Upper   |
| SE <sup>b</sup>                            | -4.430      | 16.3412    | -0.271 | 0.831           | -212.065                | 203.204 |
| Bias                                       | 0.001       | 0.0015     | 0.692  | 0.166           | -0.019                  | 0.020   |

<sup>a</sup> Random-effects meta-regression

<sup>b</sup> Standard error of effect size
